# Supplementary material for: XAS and TRLIF spectroscopy of uranium and neptunium in seawater
Source: Royal Society of Chemistry journal article supplement (doi:10.1039/c4dt03547j), 2015-01-01

Electronic Supplementary Information

***Spectroscopy of uranium and neptunium in seawater***

*Melody MALOUBIER<sup>a,b\*</sup>, Pier Lorenzo SOLARI<sup>c</sup>, Philippe MOISY<sup>d</sup>, Marguerite MONFORT<sup>b</sup>,  
Christophe DEN AUWER<sup>a</sup>, Christophe MOULIN<sup>b\*\*</sup>*

Content: 8 pages including cover sheet

Table S1: Thermodynamic constants for uranium speciation

Table S2: Thermodynamic constants for neptunium speciation

Table S3: Average concentration for co-existing metal species in seawater

Figure S4: Uranium theoretical speciation diagram at  $10^{-8}$  M in seawater

Figure S5: Neptunium theoretical speciation diagram at  $10^{-14}$  M in seawater

Figure S6: TRLIF spectra of uranium doped seawater at  $5 \cdot 10^{-5}$  M and  $10^{-5}$  M, pH 8. Time delay 5 ns, aperture time 1  $\mu$ s, number of accumulations 500.

Figure S7: XANES spectrum of the doped seawater solution at  $5 \cdot 10^{-5}$  M at the Np  $L_{II}$  edge

Table S1: Equilibrium constants for  $\text{UO}_2^{2+}$  at  $I=0$  used for the speciation calculation

\*Guidance but value not retained by the NEA-TDB

| Equilibrium                                                                                                                             | $\text{Log}_{10}K^\circ$ | Reference                                    |
|-----------------------------------------------------------------------------------------------------------------------------------------|--------------------------|----------------------------------------------|
| $\text{UO}_2^{2+} + \text{CO}_3^{2-} = \text{UO}_2\text{CO}_3(\text{aq})$                                                               | 9.94                     | Guillaumont (19)                             |
| $\text{UO}_2^{2+} + 2 \text{CO}_3^{2-} = \text{UO}_2(\text{CO}_3)_2^{2-}$                                                               | 16.61                    | Guillaumont (19)                             |
| $\text{UO}_2^{2+} + 3\text{CO}_3^{2-} = \text{UO}_2(\text{CO}_3)_3^{4-}$                                                                | 21.84                    | Guillaumont (19)                             |
| $3\text{UO}_2^{2+} + 6\text{CO}_3^{2-} = (\text{UO}_2)_3(\text{CO}_3)_3^{2-}$                                                           | 54                       | Guillaumont (19)                             |
| $\text{UO}_2^{2+} + 3\text{CO}_3^{2-} + \text{Ca}^{2+} = \text{CaUO}_2(\text{CO}_3)_3^{2-}$                                             | 27.18<br>25.4 *          | Dong (20)<br>Bernhard (21)                   |
| $\text{UO}_2^{2+} + 3\text{CO}_3^{2-} + 2\text{Ca}^{2+} = \text{Ca}_2\text{UO}_2(\text{CO}_3)_3(\text{aq})$                             | 30.70<br>30.6*           | Dong (20)<br>Guillaumont (19), Bernhard (21) |
| $\text{UO}_2^{2+} + 3\text{CO}_3^{2-} + \text{Mg}^{2+} = \text{MgUO}_2(\text{CO}_3)_3^{2-}$                                             | 26.11                    | Dong (20)                                    |
| $\text{UO}_2^{2+} + 3\text{CO}_3^{2-} + \text{Sr}^{2+} = \text{SrUO}_2(\text{CO}_3)_3^{2-}$                                             | 26.86                    | Dong (20)                                    |
| $2\text{UO}_2^{2+} + \text{CO}_3^{2-} + 3\text{H}_2\text{O} = (\text{UO}_2)_2(\text{OH})_3\text{CO}_3^- + 3\text{H}^+$                  | -0.85                    | Guillaumont (19)                             |
| $3\text{UO}_2^{2+} + \text{CO}_3^{2-} + 3\text{H}_2\text{O} = (\text{UO}_2)_3(\text{OH})_3\text{CO}_3^+ + 3\text{H}^+$                  | 0.65                     | Guillaumont (19)                             |
| $11\text{UO}_2^{2+} + 6\text{CO}_3^{2-} + 12\text{H}_2\text{O} = (\text{UO}_2)_{11}(\text{OH})_{12}(\text{CO}_3)_6^{2-} + 12\text{H}^+$ | 36.49                    | Guillaumont (19)                             |
| $2\text{F}^- + \text{UO}_2^{2+} = \text{UO}_2\text{F}_2(\text{aq})$                                                                     | 8.83                     | Guillaumont (19)                             |
| $3\text{F}^- + \text{UO}_2^{2+} = \text{UO}_2\text{F}_3^-$                                                                              | 10.90                    | Guillaumont (19)                             |
| $4\text{F}^- + \text{UO}_2^{2+} = \text{UO}_2\text{F}_4^{2-}$                                                                           | 11.84                    | Guillaumont (19)                             |
| $\text{Cl}^- + \text{UO}_2^{2+} = \text{UO}_2\text{Cl}^+$                                                                               | 0.17                     | Guillaumont (19)                             |
| $\text{Br}^- + \text{UO}_2^{2+} = \text{UO}_2\text{Br}^+$                                                                               | 0.22                     | Guillaumont (19)                             |
| $\text{SO}_4^{2-} + \text{UO}_2^{2+} = \text{UO}_2\text{SO}_4(\text{aq})$                                                               | 3.15                     | Guillaumont (19)                             |
| $2\text{SO}_4^{2-} + \text{UO}_2^{2+} = \text{UO}_2(\text{SO}_4)_2^{2-}$                                                                | 4.14                     | Guillaumont (19)                             |
| $\text{NO}_3^- + \text{UO}_2^{2+} = \text{UO}_2\text{NO}_3^+$                                                                           | 0.30                     | Guillaumont (19)                             |
| $\text{PO}_4^{3-} + \text{UO}_2^{2+} = \text{UO}_2\text{PO}_4^-$                                                                        | 13.23                    | Guillaumont (19)                             |
| $\text{UO}_2^{2+} + \text{HPO}_4^{2-} = \text{UO}_2\text{HPO}_4(\text{aq})$                                                             | 7.24                     | Guillaumont (19)                             |

Table S2: Equilibrium constants for  $\text{NpO}_2^+$  at  $I=0$  used for the speciation calculation

| Equilibrium                                                                                                           | $\text{Log}_{10}K^\circ$ | Reference        |
|-----------------------------------------------------------------------------------------------------------------------|--------------------------|------------------|
| $\text{NpO}_2^+ + \text{CO}_3^{2-} = \text{NpO}_2\text{CO}_3^-$                                                       | 4.962                    | Guillaumont (19) |
| $\text{NpO}_2^+ + 2 \text{CO}_3^{2-} = \text{NpO}_2(\text{CO}_3)_2^{3-}$                                              | 6.534                    | Guillaumont (19) |
| $\text{NpO}_2^+ + 3\text{CO}_3^{2-} = \text{NpO}_2(\text{CO}_3)_3^{5-}$                                               | 5.500                    | Guillaumont (19) |
| $\text{NpO}_2^{2+} + 2\text{CO}_3^{2-} + \text{H}_2\text{O} = \text{NpO}_2(\text{CO}_3)_2\text{OH}^{4-} + \text{H}^+$ | -5.305                   | Guillaumont (19) |
| $\text{F}^- + \text{NpO}_2^+ = \text{NpO}_2\text{F}(\text{aq})$                                                       | 1.2                      | Guillaumont (19) |
| $\text{SO}_4^{2-} + \text{NpO}_2^+ = \text{NpO}_2\text{SO}_4^-$                                                       | 0.44                     | Guillaumont (19) |
| $\text{HPO}_4^{2-} + \text{NpO}_2^+ = \text{NpO}_2\text{PO}_4^{2-} + \text{H}^+$                                      | -5.38                    | Morgenstern (22) |
| $\text{HPO}_4^{2-} + \text{NpO}_2^+ = \text{NpO}_2\text{HPO}_4^-$                                                     | 2.95                     | Guillaumont (19) |

Table S3: Average concentration for co-existing metal and other species in sweater

| Metal | Concentration (nM)  | Reference                           |
|-------|---------------------|-------------------------------------|
| Zn    | 8.1                 | Nolting (24)<br>Saager (25)         |
| Cu    | 3.3                 | Nolting (23,24)<br>Saager (25)      |
| Fe    | 2.7                 | Nolting (23)                        |
| Co    | 0.11                | Robertson (27)                      |
| Pb    | 0.17                | Schaule (28)                        |
| Cd    | 1.0                 | Quinby-Hunt (30)<br>Nolting (23,24) |
| Ni    | 11                  | Quinby-Hunt (30)<br>Nolting (24)    |
| Hg    | $8.5 \cdot 10^{-3}$ | Mason (31) ,<br>Ólafsson (32)       |
| Al    | 38                  | Measures (33)                       |
| I     | 500                 | Wong (29)                           |
| B     | 0.4 mM              | Noakes (26)                         |

Figure S4: Uranium theoretical speciation diagram at 10<sup>-8</sup> M in seawater

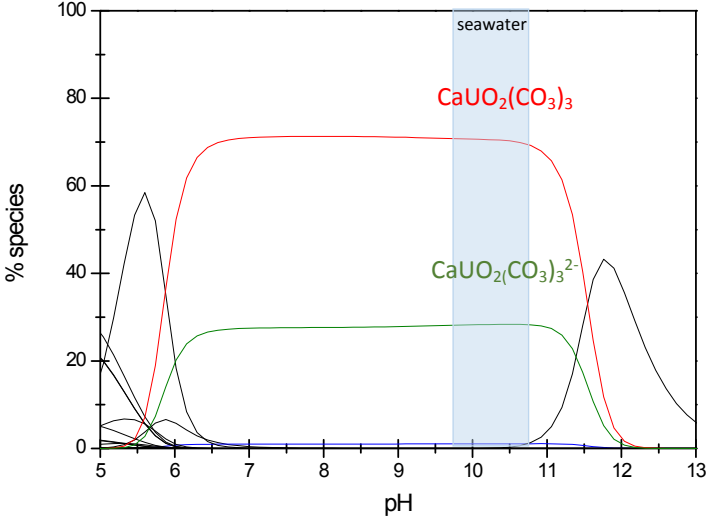

Figure S5: Neptunium theoretical speciation diagram at  $10^{-14}$  M in seawater

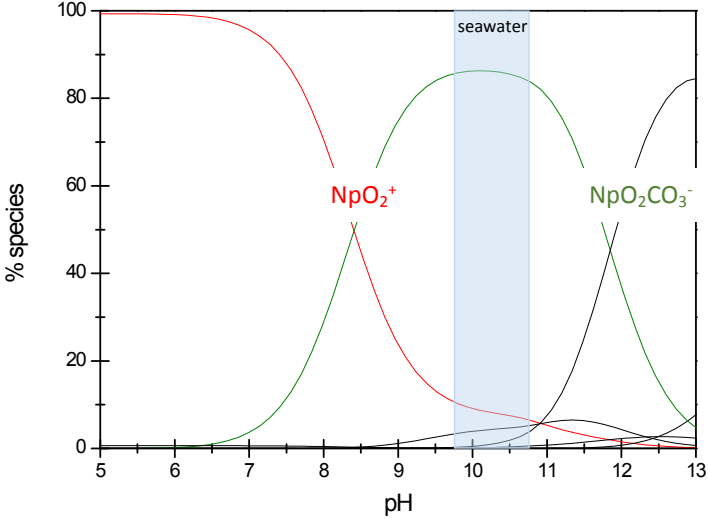

Figure S6: TRLIF spectra of uranium doped seawater at  $5 \cdot 10^{-5}$  M and  $10^{-5}$  M, pH 8. Time delay 5 ns, aperture time  $1 \mu\text{s}$ , number of accumulations 500.

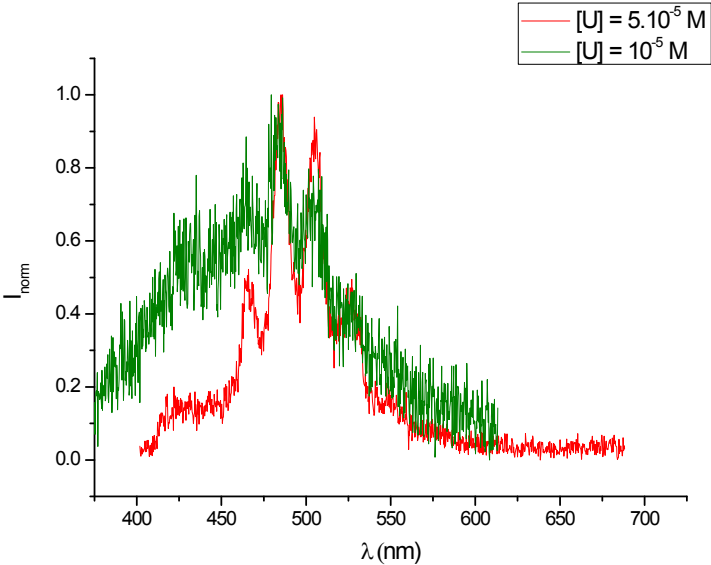

Figure S7: Experimental Np L<sub>II</sub> edge XANES spectrum of the doped seawater solution at 5.10<sup>-5</sup> M

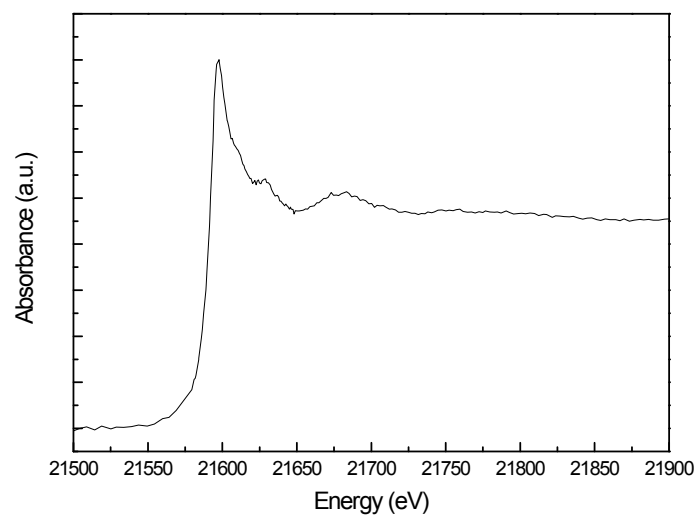

Supplement: c4dt03547j1.pdf [file c4dt03547j1.pdf]
